# Supplementary material for: Synthesis of carbon dots from spent coffee grounds: transforming waste into potential biomedical tools
Source: Royal Society of Chemistry journal article supplement (doi:10.1039/d4nr05186f), 2025-01-01
Supplement: d4nr05186f1.pdf [file d4nr05186f1.pdf]

## SUPPLEMENTARY INFORMATION

---

### Synthesis of Carbon Dots from Spent Coffee Grounds: Transforming Waste into Potential Biomedical Tools

Yingru Zhou <sup>[a,b]</sup>, Adalberto Camisasca <sup>[a]</sup>, Sofia Dominguez-Gil <sup>[a]</sup>, Michał Bartkowski <sup>[a]</sup>, Keith D. Rochfort <sup>[b, c]</sup>, Martina Piletti <sup>[d]</sup>, Anita White <sup>[b,c]</sup>, Dorottya Krizsan <sup>[e]</sup>, Rob O'Connor <sup>[f]</sup>, Susan J. Quinn <sup>[e]</sup>, Daniela Iacopino <sup>[d]</sup>, Alex J. Eustace <sup>\*[b,c]</sup>, Silvia Giordani <sup>\*[a,b]</sup>

[a] Y. Zhou, Dr. A. Camisasca, Dr. S. Dominguez-Gil, Dr. M. Bartkowski, Prof. S. Giordani.  
School of Chemical Science  
Dublin City University  
Glasnevin, Dublin, Ireland  
E-mail: [silvia.giordani@dcu.ie](mailto:silvia.giordani@dcu.ie)

[b] Y. Zhou, Dr. K.D. Rochfort, A. White, Dr. A. J. Eustace, Prof. S. Giordani.  
Life Sciences Institute  
Dublin City University  
Glasnevin, Dublin, Ireland

[c] Dr. K.D. Rochfort, A. White, Dr. A. J. Eustace.  
School of Biotechnology  
Dublin City University  
Glasnevin, Dublin, Ireland  
E-mail: [alex.eustace@dcu.ie](mailto:alex.eustace@dcu.ie)

[d] M. Piletti, Dr. D. Iacopino.  
Tyndall National Institute  
University College Cork  
Cork, Ireland

[e] Dr. D. Krizsan, Prof. S. J. Quinn.  
School of Chemistry  
University College Dublin  
Belfield, Dublin, Ireland

[f] Dr. R. O'Connor  
School of Physical Sciences,  
Dublin City University  
Glasnevin, Dublin, Ireland

## SUPPLEMENTARY INFORMATION

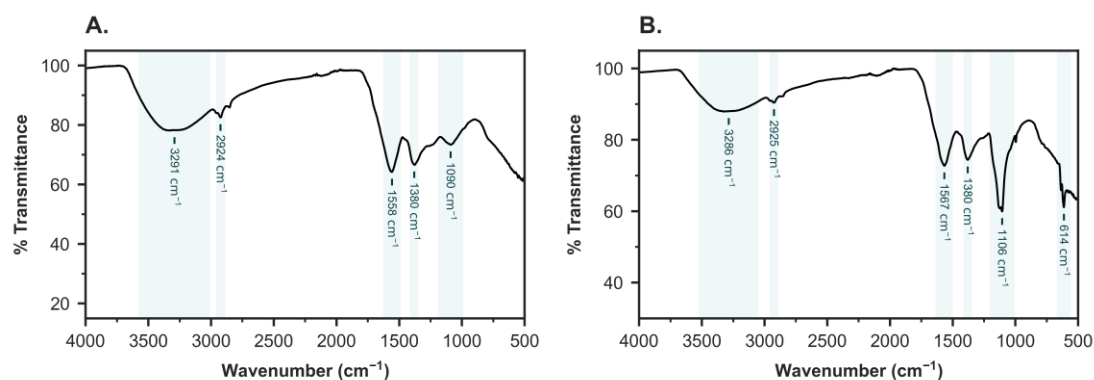

**Fig S1.** ATR-FTIR spectra of **A.** D-LAV-CDs and **B.** D-KEN-CDs. Prominent bands have been highlighted and labelled with the corresponding wavenumber.

**Tab S1.** Wavenumbers corresponding to key functional groups observed in the ATR-FTIR spectra of AP-LAV-CDs, D-LAV -CDs and D-KEN-CDs. The symbol  $\nu$  denotes stretching vibrations and *n.p.* denotes 'not present'.

|                               | AP-LAV-CDs (cm <sup>-1</sup> ) | D-LAV-CDs (cm <sup>-1</sup> ) | D-KEN-CDs (cm <sup>-1</sup> ) |
|-------------------------------|--------------------------------|-------------------------------|-------------------------------|
| $\nu(\text{OH})$              | 3322                           | 3291                          | 3286                          |
| $\text{sp}^3 \nu(\text{C-H})$ | <i>n.p.</i>                    | 2924                          | 2925                          |
| $\nu(\text{C=O})$             | 1598                           | 1558                          | 1567                          |
| $\nu(\text{C=C})$             | 1402                           | 1380                          | 1380                          |
| $\nu(\text{C-O-C})$           | 1099                           | 1106                          | 1106                          |
| fingerprint region            | 611                            | <i>n.p.</i>                   | 614                           |

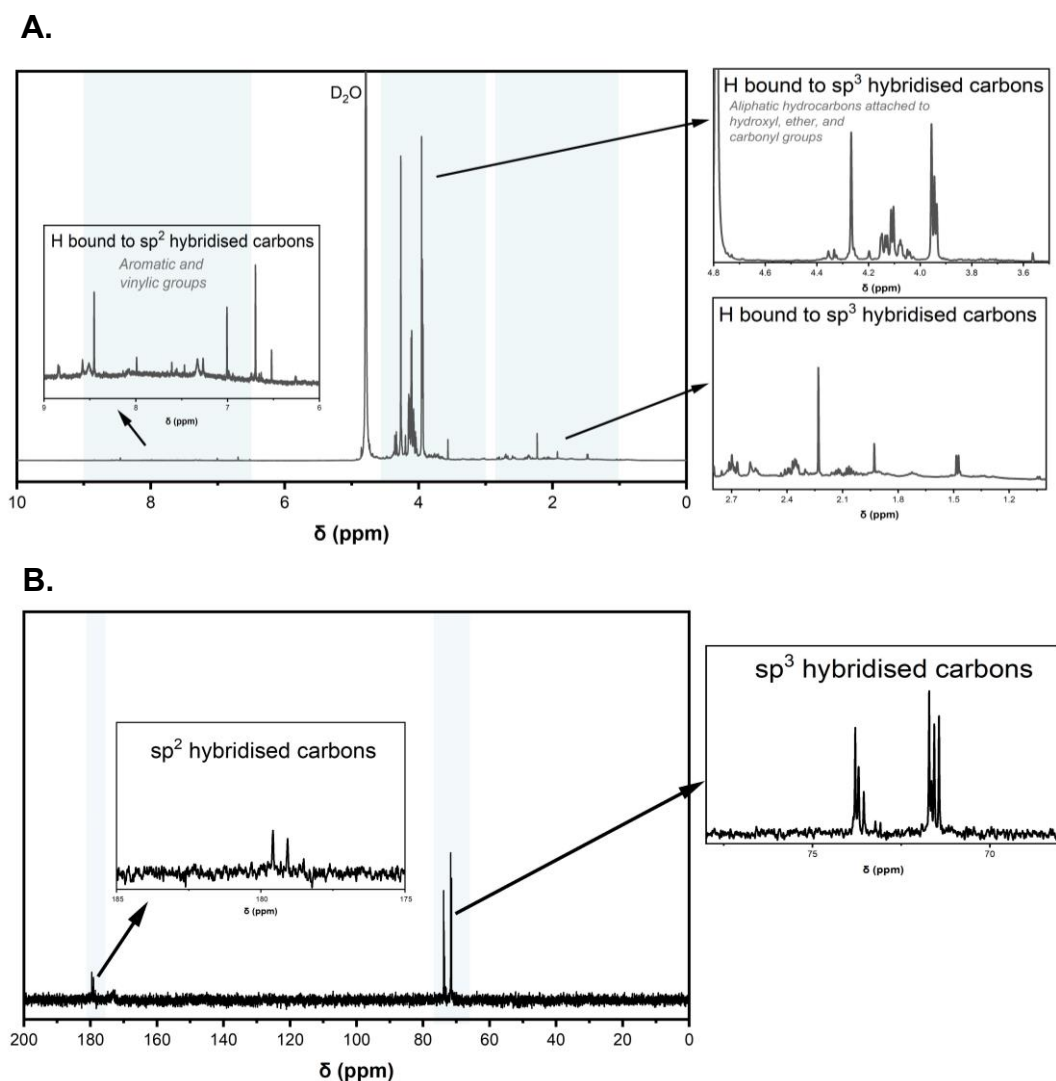

**Fig S2.** NMR spectra of AP-LAV-CDs. **A.**  $^1\text{H}$  NMR spectrum (1024 scans), showing signals from  $\text{sp}^3$ - and  $\text{sp}^2$ -hybridised carbon atoms. *Insets:* Expanded regions from 9-6 ppm, 4.8-4.5 ppm, and 2.8-1 ppm. **B.**  $^{13}\text{C}$  NMR spectrum (4096 scans), displaying  $\text{sp}^3$ - and  $\text{sp}^2$ -hybridised carbon atoms, with peaks around 70 ppm and 180 ppm, respectively. *Inset:* Expanded regions from 185-175 ppm and 78-68 ppm.

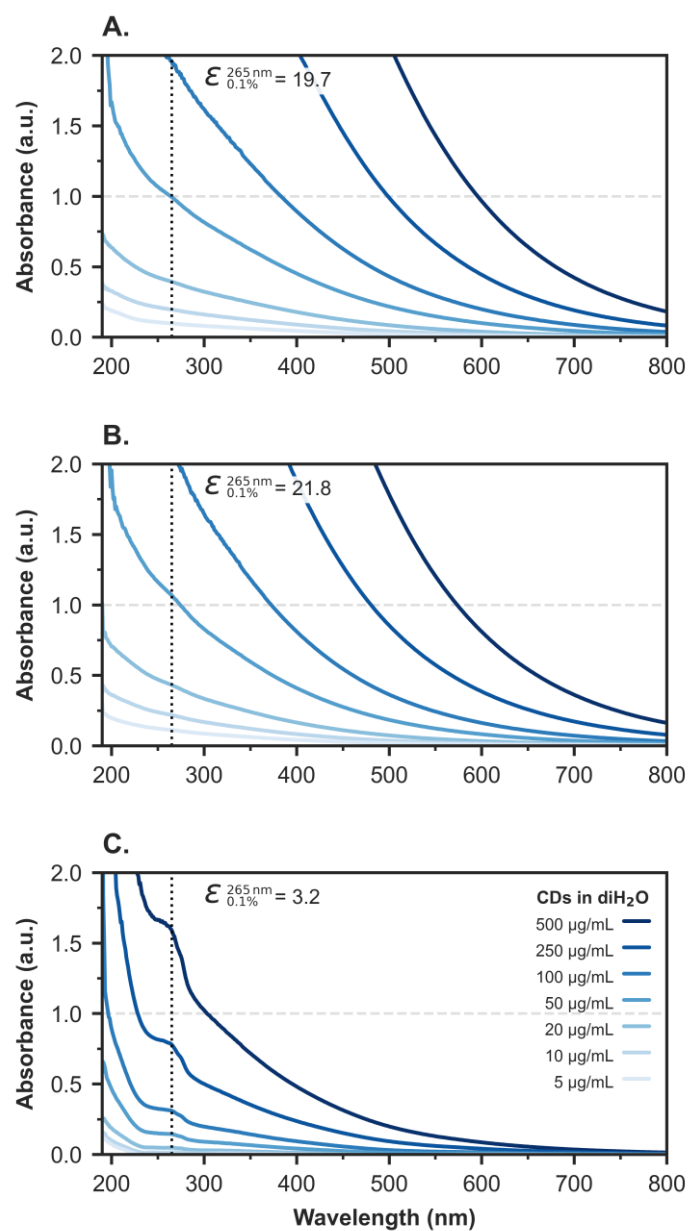

**Fig S3.** UV-Vis absorption spectra of **A.** D-LAV-CDs, **B.** D-KEN-CDs and **C.** AP-LAV-CDs dispersed in diH<sub>2</sub>O at 5, 10, 20, 50, 100, 250 and 500 µg/mL. The 0.1% excitation coefficient calculated at 265 nm for concentrations  $\leq 50$  µg/mL is shown.

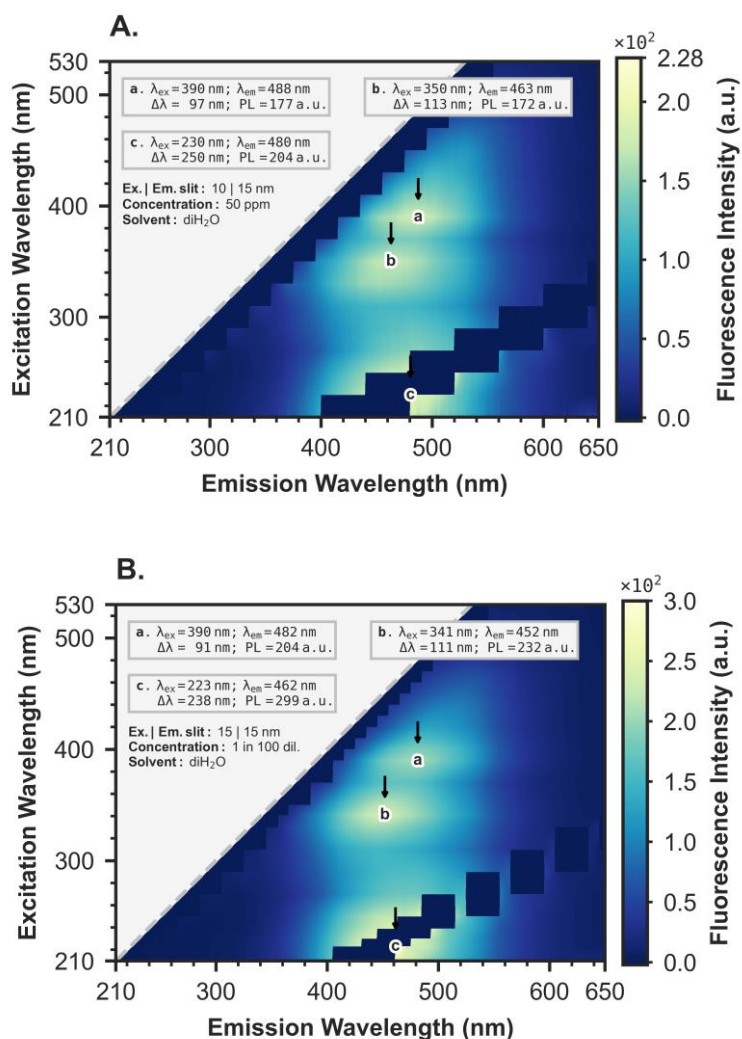

**Fig S4.** Fluorescence excitation emission matrix (EEM) spectra of **A.** D-KEN-CDs and **B.** D-LAV-CDs. Relevant experimental conditions have been noted, and significant emission regions have been annotated as **a**, **b** & **c**, with the excitation wavelength ( $\lambda_{ex}$ ), emission wavelength ( $\lambda_{em}$ ) and Stokes shift ( $\Delta\lambda$ ) at the point of highest intensity emission (PL). First- and second-order Rayleigh scattering signals have been excluded (dark spaces).

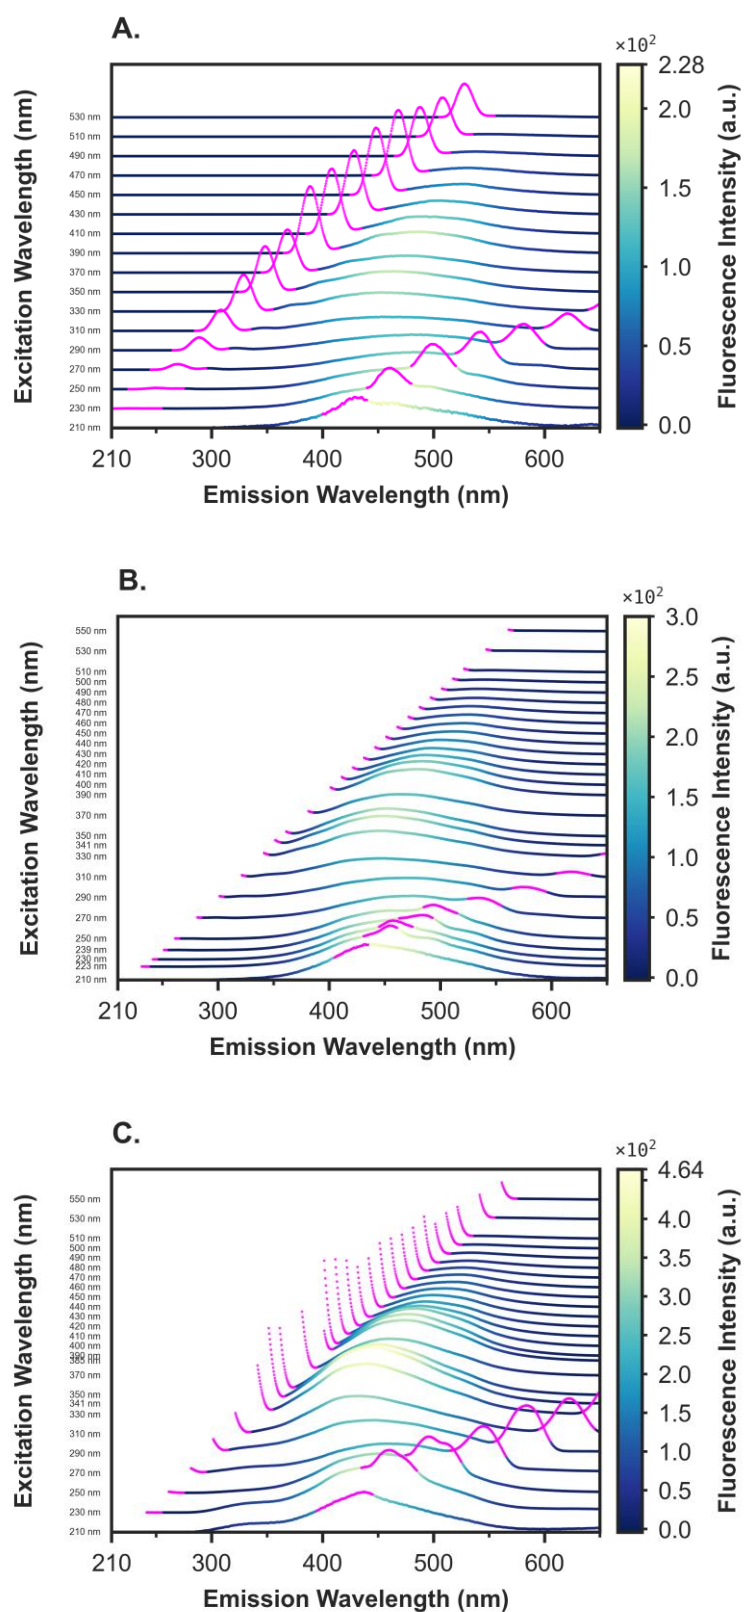

**Fig S5.** Fluorescence emission spectroscopy data of **A.** D-KEN-CDs; **B.** D-LAV-CDs; and **C.** AP-LAV-CDs visualised in an alternative approach to the EEM. First- and second-order Rayleigh scattering signals have been highlighted in pink.

## SUPPLEMENTARY INFORMATION

**Tab S2.** Summary of SCG-derived CDs' fluorescence emission results; included are the excitation wavelength ( $\lambda_{\text{ex}}$ ), emission wavelength ( $\lambda_{\text{em}}$ ), Stokes shift ( $\Delta\lambda$ ), and highest intensity emission (PL) for the annotated regions **a**, **b**, and **c** in the respective fluorescence excitation emission matrix (EEM) spectra of AP-LAV-CDs, D-LAV-CDs and D-KEN-CDs.

| Region   | Parameter                  | AP-LAV-CDs | D-LAV-CDs | D-KEN-CDs |
|----------|----------------------------|------------|-----------|-----------|
| <b>a</b> | $\lambda_{\text{ex}}$ (nm) | 390        | 390       | 390       |
| <b>a</b> | $\lambda_{\text{em}}$ (nm) | 478        | 482       | 488       |
| <b>a</b> | $\Delta\lambda$ (nm)       | 88         | 91        | 97        |
| <b>a</b> | PL (a.u.)                  | 345        | 204       | 177       |
| <b>b</b> | $\lambda_{\text{ex}}$ (nm) | 341        | 341       | 350       |
| <b>b</b> | $\lambda_{\text{em}}$ (nm) | 445        | 452       | 463       |
| <b>b</b> | $\Delta\lambda$ (nm)       | 104        | 111       | 113       |
| <b>b</b> | PL (a.u.)                  | 462        | 232       | 172       |
| <b>c</b> | $\lambda_{\text{ex}}$ (nm) | 230        | 223       | 230       |
| <b>c</b> | $\lambda_{\text{em}}$ (nm) | 434        | 462       | 480       |
| <b>c</b> | $\Delta\lambda$ (nm)       | 204        | 238       | 250       |
| <b>c</b> | PL (a.u.)                  | 368        | 299       | 204       |

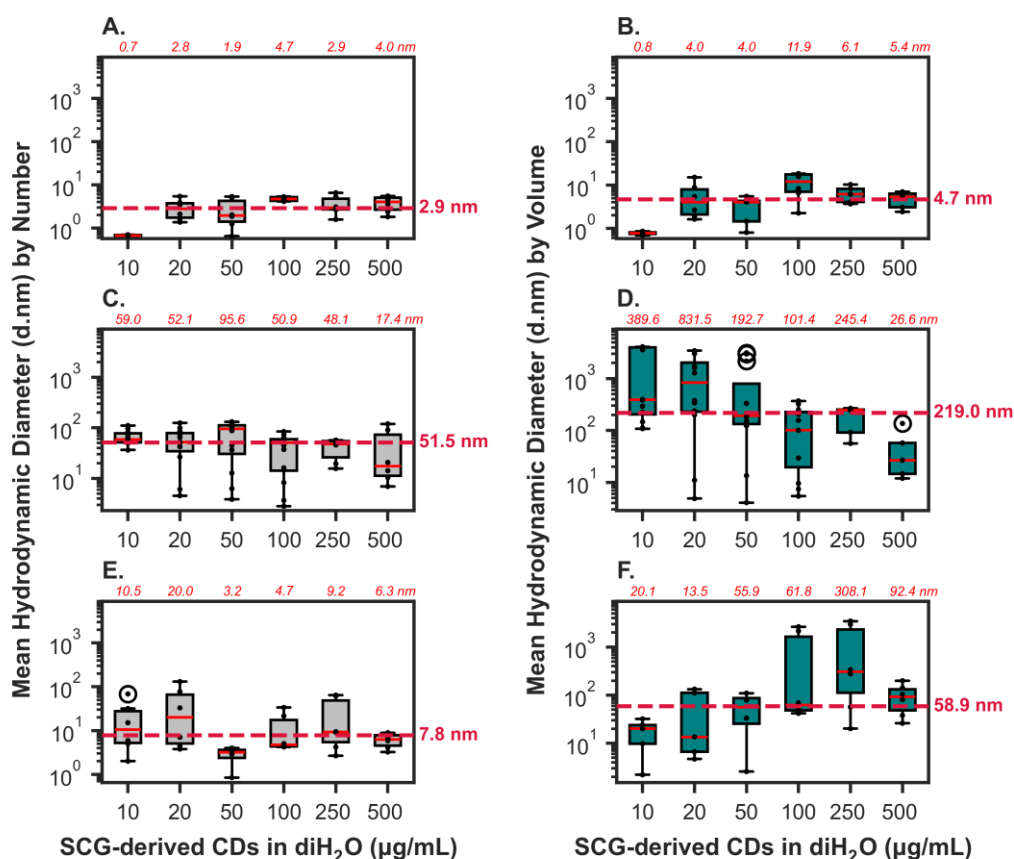

**Fig S6.** DLS hydrodynamic diameter (d.nm) data of **A. & B.** AP-LAV-CDs represented by number and by volume, respectively; **C. & D.** D-LAV-CDs represented by number and by volume, respectively; **E. & F.** D-KEN-CDs represented by number and by volume, respectively. The SCG-derived CDs have been dispersed in diH<sub>2</sub>O at 10, 20, 50, 100, 250 and 500 µg/mL, and the data represents  $n \geq 6$  runs. The data for each concentration has been represented as a box and whisker plot. The individual median values for each concentration, as well as the overall median across all concentrations, have been annotated in red.

**Tab S3.** DLS mean hydrodynamic diameter (d.nm) data for AP-LAV-CDs, D-LAV-CDs, and D-KEN-CDs, represented by number distribution. The SCG-derived CDs were dispersed in diH<sub>2</sub>O at concentrations of 10, 20, 50, 100, 250, and 500 µg/mL. Data is presented as mean  $\pm$  standard deviation from  $n \geq 6$  runs for each concentration.

| Concentration (µg/mL) | AP-LAV-CDs (nm) | D-LAV-CDs (nm)  | D-KEN-CDs (nm)  |
|-----------------------|-----------------|-----------------|-----------------|
| 10                    | 0.7 $\pm$ 0.1   | 66.8 $\pm$ 22.4 | 21.3 $\pm$ 25.4 |
| 20                    | 3.0 $\pm$ 1.6   | 57.1 $\pm$ 37.5 | 42.7 $\pm$ 51.6 |
| 50                    | 2.7 $\pm$ 2.0   | 73.5 $\pm$ 49.1 | 2.8 $\pm$ 1.4   |
| 100                   | 4.7 $\pm$ 0.5   | 42.3 $\pm$ 28.4 | 12.2 $\pm$ 12.5 |
| 250                   | 3.7 $\pm$ 1.9   | 40.7 $\pm$ 18.5 | 25.1 $\pm$ 29.2 |
| 500                   | 3.8 $\pm$ 1.5   | 43.8 $\pm$ 48.7 | 6.2 $\pm$ 2.2   |



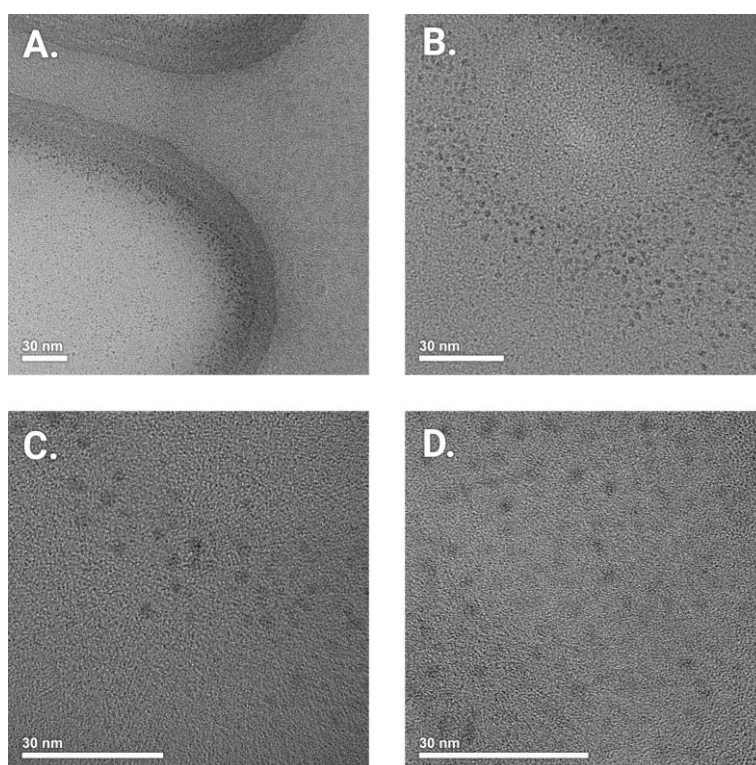

**Fig S7.** TEM images of AP-LAV-CDs at four different magnifications (**A.** 80,000x, **B.** 150,000x, **C.** 250,000x, and **D.** 300,000x); all images have been fitted with a 30 nm scale bar.

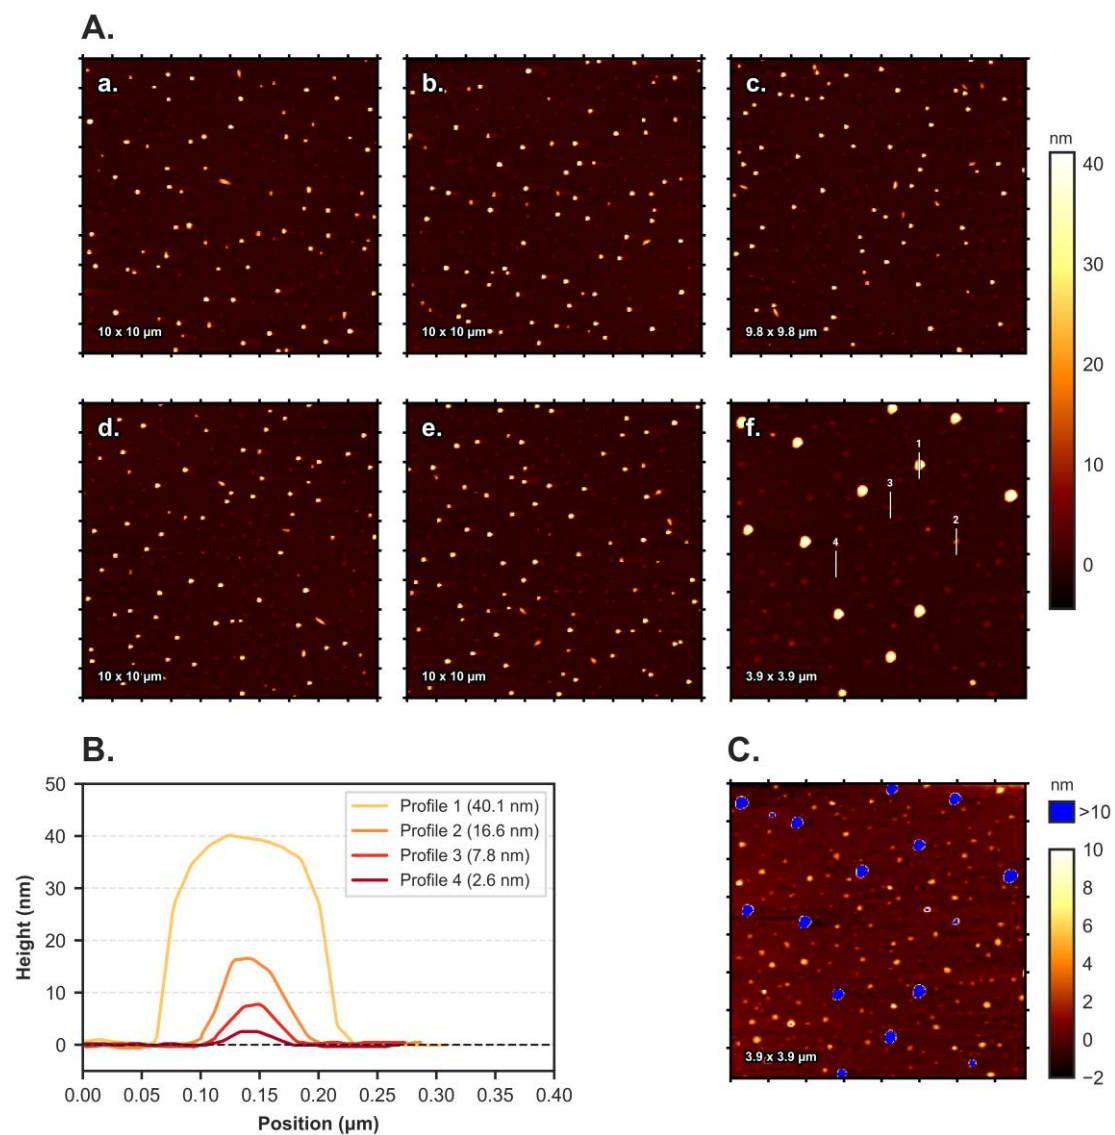

**Fig S8. A.** AFM images of AP-LAV-CDs at different scan sizes. All AFM images **a-f.** have been represented using a common colour-scale for comparative purposes. **B.** Line profiles 1 to 4, respectively marked in subfigure **f.**, highlighting NPs of different heights; the maximum height of each line profile is provided in its respective legend entry. **C.** AFM image **f.** with the colour-scale normalised to a maximum height of 10 nm to better visualise small (< 10 nm height) NPs. Height data clipping > 10 nm has been highlighted in blue.

## SUPPLEMENTARY INFORMATION

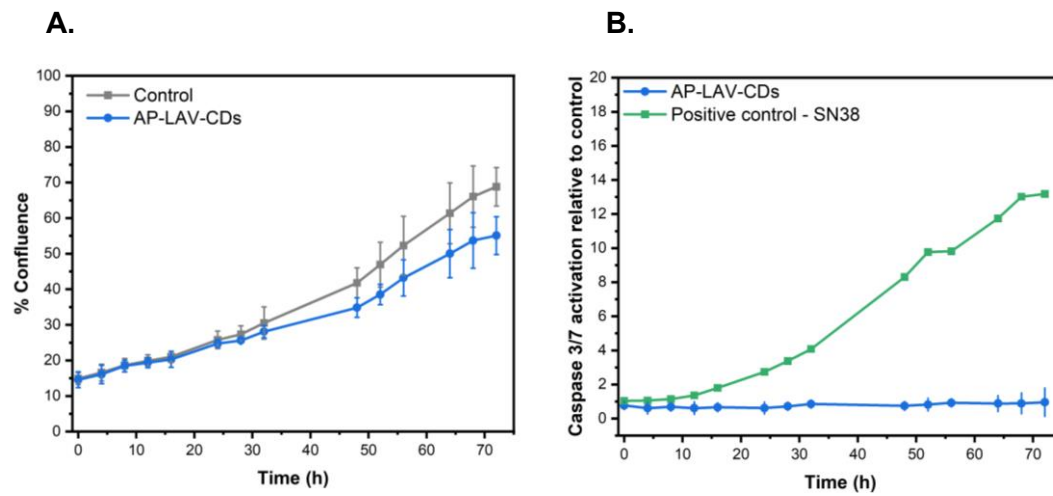

**Fig S9.** Apoptosis study on AP-LAV-CDs with InCucyte® Live-Cell Analysis System **A.** Cell confluency of CAL-51 cells treated with 250  $\mu\text{g/mL}$  AP-LAV-CDs; **B.** Apoptosis signal in CAL-51 cells treated with 250  $\mu\text{g/mL}$  AP-LAV-CDs compared to the positive control SN38. Data is normalized to untreated controls to account for baseline apoptosis levels.

## SUPPLEMENTARY INFORMATION

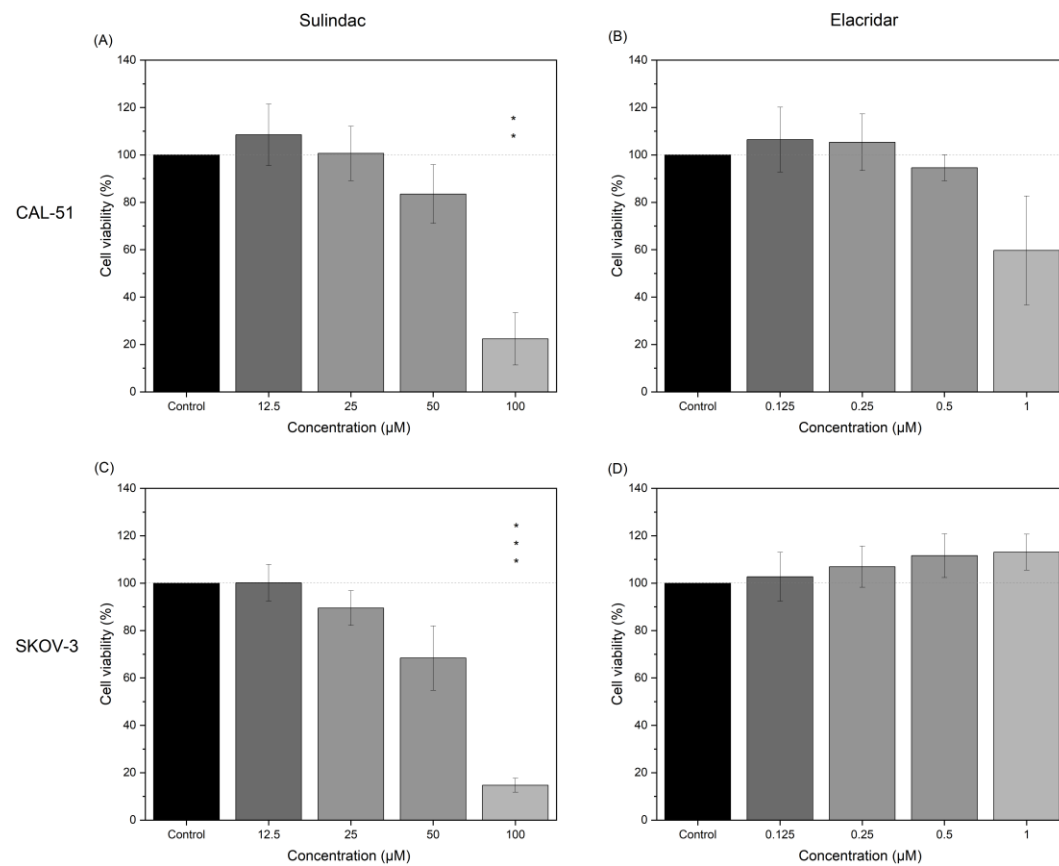

**Fig S10.** Cellular viability of **A.** CAL-51 cells treated with sulindac; **B.** CAL-51 cells treated with elacridar; **C.** SKOV-3 cells treated with sulindac; and **D.** SKOV-3 cells treated with elacridar. Cells were exposed to sulindac at concentrations of 0 (control), 12.5, 25, 50, and 100  $\mu\text{M}$ , and to elacridar at concentrations of 0 (control), 0.125, 0.25, 0.50, and 1  $\mu\text{M}$ , for 120 h. Data represent the mean  $\pm$  standard deviation of three replicates.
